# Supplementary material for: Modelling Sand Fly Lutzomyia longipalpis Attraction to Host Odour: Synthetic Sex-Aggregation Pheromone Dominates the Response
Source: MDPI journal article supplement (doi:10.3390/microorganisms9030602), 2021-03-15
Supplement: s1 [file s1]

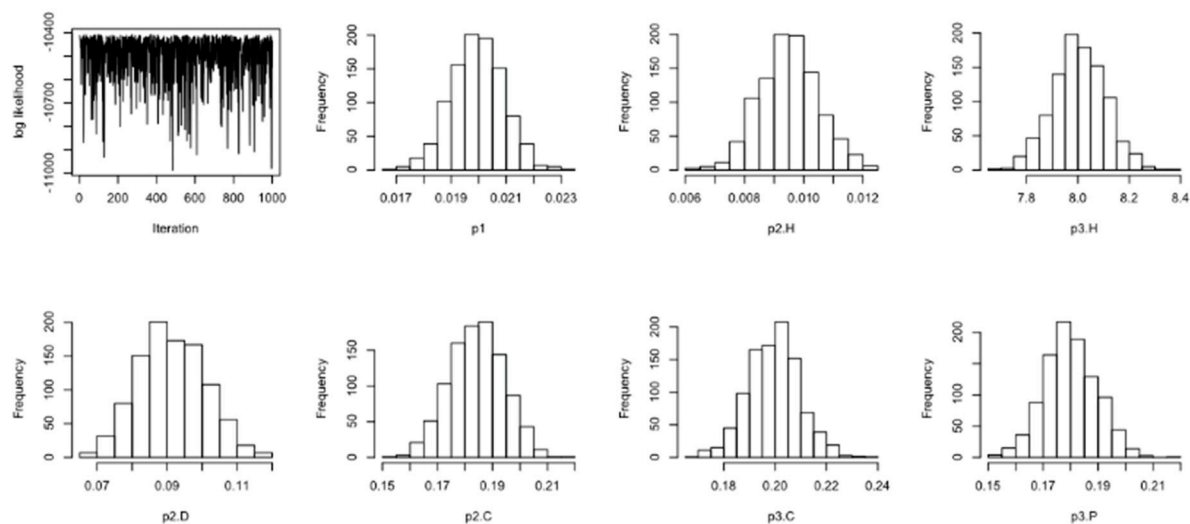

**Figure 1.** MCMC chain and posterior distribution of parameters.

**Table 1.** Household characteristics

| Characteristics                          | Value |
|------------------------------------------|-------|
| Number of households                     | 235   |
| Average number of humans per household   | 4.67  |
| Average number of dogs per household     | 1.09  |
| Average number of chickens per household | 6.8   |
